# Supplementary material for: Urolithin M5 from the Leaves of Canarium album (Lour.) DC. Inhibits Influenza Virus by Targeting Neuraminidase
Source: MDPI journal article supplement (doi:10.3390/molecules27175724), 2022-09-05
Supplement: s1 [file s1]

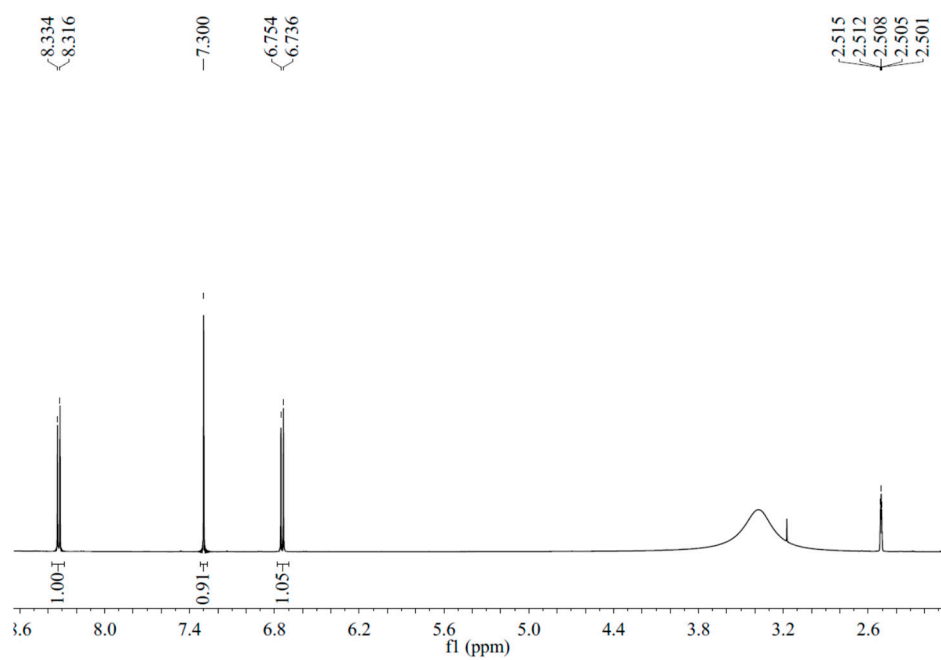

**Figure S1.**  $^1\text{H}$  NMR (500 MHz,  $\text{CD}_3\text{OD}$ ) spectrum of urolithin M5.

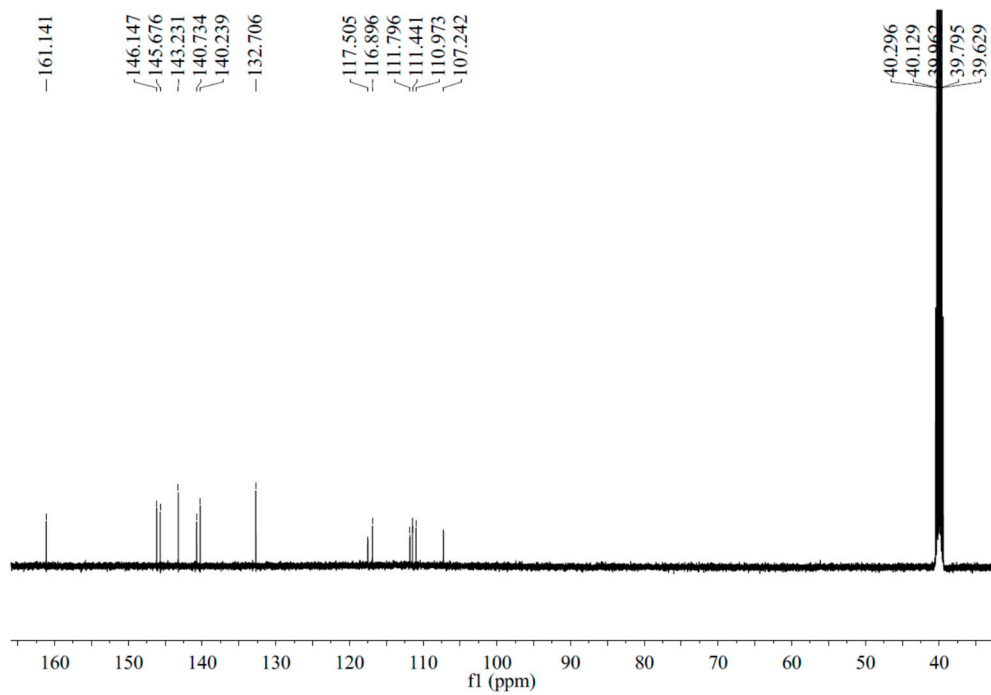

**Figure S2.**  $^{13}\text{C}$  NMR (125 MHz,  $\text{CD}_3\text{OD}$ ) spectrum of urolithin M5.

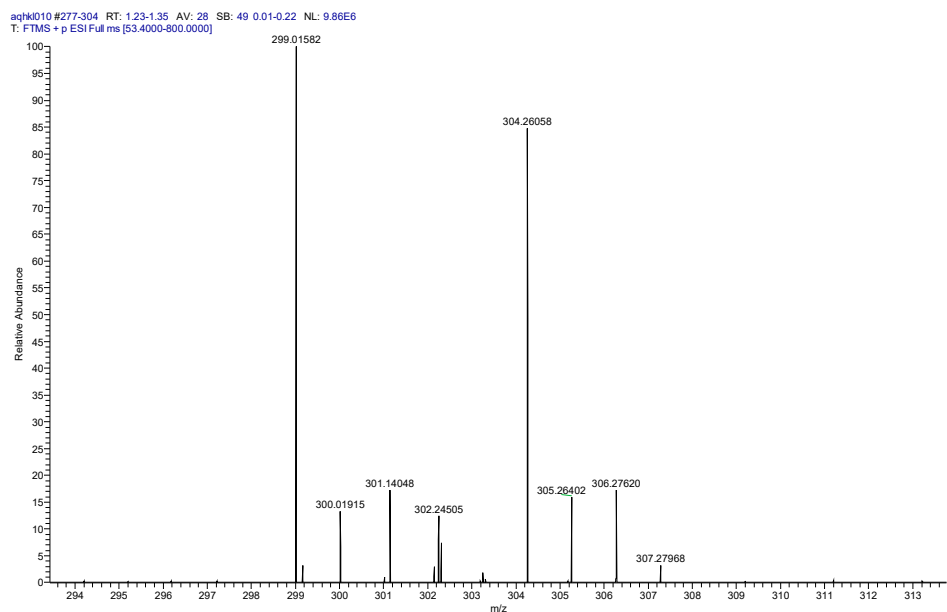

**Figure S3.** HRESIMS spectrum of urolithin M5.

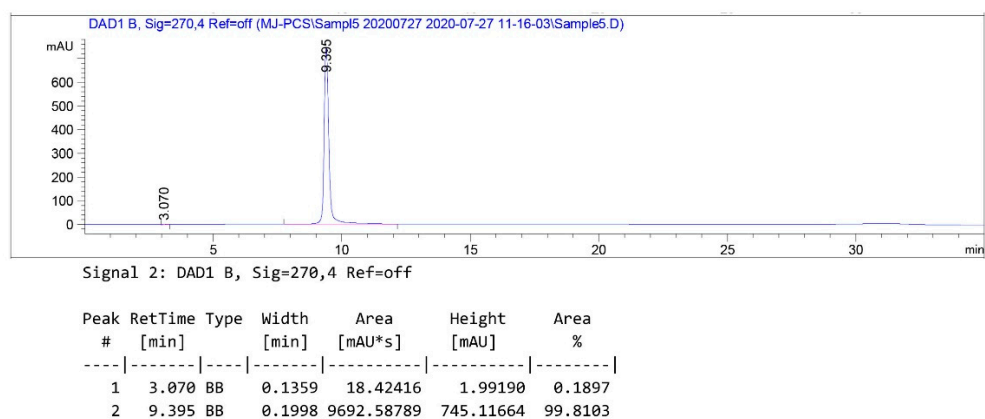

**Figure S4.** HPLC spectrum of urolithin M5.

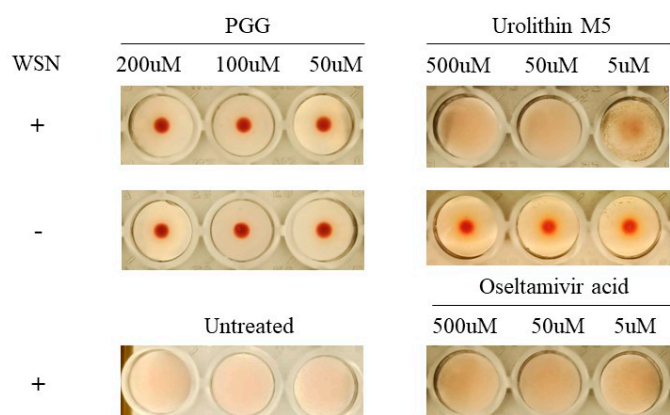

**Figure S5.** Hemagglutination inhibitory assay of urolithin M5.
